# Supplementary material for: Comprehensive genetic characteristics of dystrophinopathies in China
Source: PubMed Central journal article supplement (PMC6032532; doi:10.1186/s13023-018-0853-z), 2018-07-04
Supplement: 13023_2018_853_MOESM1_ESM.pdf [file 13023_2018_853_MOESM1_ESM.pdf]

Additional file 1: Clinical and genetic information of patients with small mutation.

| Patient | Age  | Diagnosis | Ambulatory | Age at loss of ambulation | Mutation type | Exon  | DNA change                  | Protein(predicted) | Report     | Carrier status of mother |
|---------|------|-----------|------------|---------------------------|---------------|-------|-----------------------------|--------------------|------------|--------------------------|
| 1       | 11.8 | DMD       | Yes        |                           | Nonsense      | 44    | c.6370G>T                   | p.Glu2124*         | unreported | Unknown                  |
| 2       | 22.6 | DMD       | No         | 11.0                      | Nonsense      | 41    | c.5889C>T                   | p.Arg1967*         | reported   | Yes                      |
| 3       | 8.4  | DMD       | Yes        |                           | Nonsense      | 8     | c.829C>T                    | p.Gln277*          | reported   | Yes                      |
| 4       | 11.6 | DMD       | Yes        |                           | Small del     | 40    | c.5602_5605delAGAA          | p.Arg1868Glufs*5   | reported   | Unknown                  |
| 5       | 12.9 | DMD       | No         | 9.0                       | Nonsense      | 55    | c.8038C>T                   | p.2680Arg*         | reported   | Yes                      |
| 6       | 8.7  | DMD       | Yes        |                           | Splicing      | int32 | c.4518+2T>C                 |                    | reported   | Yes                      |
| 7       | 13.0 | DMD       | No         | 11.0                      | Small del     | 10    | c.1076delA                  | p.Glu359Glyfs*17   | unreported | Unknown                  |
| 8       | 14.2 | DMD       | No         | 12.0                      | Nonsense      | 65    | c.9445C>T                   | p.Gln3149*         | reported   | Unknown                  |
| 9       | 10.4 | DMD       | Yes        |                           | Nonsense      | 59    | c.8713C>T                   | p.Arg2905*         | reported   | Unknown                  |
| 10      | 9.1  | DMD       | Yes        |                           | Nonsense      | 10    | c.998C>A                    | p.Ser333*          | reported   | Yes                      |
| 11      | 9.1  | DMD       | Yes        |                           | Nonsense      | 12    | c.1465C>T                   | p.Gln489*          | reported   | Yes                      |
| 12      | 7.6  | DMD       | Yes        |                           | Small del     | 56    | c.8227delG                  | p.Gly2743Valfs*21  | unreported | Yes                      |
| 13      | 9.9  | DMD       | Yes        |                           | Nonsense      | 8     | c.826C>T                    | p.Gln276*          | reported   | Unknown                  |
| 14      | 13.3 | DMD       | No         | 9.0                       | Small del     | 6     | c.522_523delTA              | p.His174Glnfs*3    | unreported | No                       |
| 15      | 12.7 | DMD       | No         | 9.0                       | Nonsense      | 22    | c.2832T>G                   | p.Tyr944*          | unreported | Unknown                  |
| 16      | 11.3 | DMD       | Yes        |                           | Nonsense      | 23    | c.3087G>A                   | p.Trp1029*         | reported   | Yes                      |
| 17      | 8.7  | DMD       | Yes        |                           | Nonsense      | 6     | c.433c>T                    | p.Arg145*          | reported   | Unknown                  |
| 18      | 8.1  | DMD       | Yes        |                           | Splicing      | 56    | c.8390G>A                   |                    | unreported | Unknown                  |
| 19      | 6.0  | DMD       | Yes        |                           | Nonsense      | 58    | c.8608C>T                   | p.Arg2870*         | reported   | Yes                      |
| 20      | 9.5  | DMD       | Yes        |                           | Splicing      | int17 | c.2169-2A>G                 |                    | reported   | Unknown                  |
| 21      | 9.0  | DMD       | Yes        |                           | Small del     | 12    | c.1412delC                  | p.Thr471Lysfs*16   | unreported | Yes                      |
| 22      | 8.2  | DMD       | Yes        |                           | Nonsense      | 27    | c.3622C>T                   | p.Gln1208*         | reported   | Unknown                  |
| 23      | 8.9  | DMD       | Yes        |                           | Small del     | 70    | c.10101_10103delAG          | p.Glu3367del       | reported   | No                       |
| 24      | 10.5 | DMD       | Yes        |                           | Nonsense      | 30    | c.4117C>T                   | p.Gln1373*         | reported   | Unknown                  |
| 25      | 12.5 | IMD       | Yes        |                           | Nonsense      | 5     | c.336G>A                    | p.Trp112*          | reported   | Yes                      |
| 26      | 14.0 | DMD       | No         | 7.0                       | Nonsense      | 59    | c.8812G>T                   | p.Glu2938*         | unreported | Unknown                  |
| 27      | 10.6 | DMD       | Yes        |                           | Nonsense      | 56    | c.8475G>A                   | p.Trp2915*         | unreported | Unknown                  |
| 28      | 12.0 | DMD       | No         | 9.0                       | Small del     | 45    | c.6439-104253_6615-13966del | p.Glu2147Alafs*17  | reported   | Unknown                  |
| 29      | 9.0  | DMD       | Yes        |                           | Nonsense      | 70    | c.10108C>T                  | p.Arg3370*         | reported   | Unknown                  |
| 30      | 10.1 | DMD       | Yes        |                           | Nonsense      | 14    | c.1684C>T                   | p.Gln562*          | reported   | Yes                      |
| 31      | 9.2  | DMD       | Yes        |                           | Nonsense      | 8     | c.748G>T                    | p.Glu250*          | reported   | No                       |
| 32      | 14.4 | DMD       | No         | 11.0                      | Small del     | 13    | c.1593delA                  | p.Glu531Aspfs*52   | unreported | No                       |
| 33      | 11.6 | DMD       | No         | 7.0                       | Nonsense      | 64    | c.9337C>T                   | p.Arg3113*         | reported   | Unknown                  |
| 34      | 9.0  | DMD       | Yes        |                           | Small del     | 53    | c.7755delG                  | p.Trp2585Cysfs*12  | unreported | Yes                      |
| 35      | 10.1 | DMD       | Yes        |                           | Nonsense      | 6     | c.433c>T                    | p.Arg145*          | reported   | Unknown                  |
| 36      | 5.6  | DMD       | Yes        |                           | Nonsense      | 44    | c.6423C>A                   | p.Tyr2141*         | reported   | No                       |
| 37      | 10.1 | DMD       | Yes        |                           | Splicing      | int2  | c.44-1G>T                   |                    | unreported | Yes                      |
| 38      | 14.3 | IMD       | Yes        |                           | Small ins     | 20    | c.2462-2463insA             | p.Glu821Glufs*     | unreported | Unknown                  |
| 39      | 12.9 | IMD       | Yes        |                           | Nonsense      | 7     | c.583C>T                    | p.Arg195*          | reported   | Unknown                  |
| 40      | 13.0 | IMD       | Yes        |                           | Nonsense      | 70    | c.10141C>T                  | p.Arg3381*         | reported   | Unknown                  |
| 41      | 11.9 | DMD       | No         | 9.0                       | Nonsense      | 58    | c.8608C>T                   | p.Arg2870*         | reported   | No                       |
| 42      | 7.2  | DMD       | Yes        |                           | Small del     | 51    | c.7341delA                  | p.Gln2447Hisfs*13  | unreported | Yes                      |
| 43      | 12.2 | DMD       | No         | 9.0                       | Nonsense      | 55    | c.8038C>T                   | p.Arg2680*         | reported   | Unknown                  |
| 44      | 7.2  | DMD       | Yes        |                           | Splicing      | int70 | c.10228+1G>A                |                    | reported   | Unknown                  |
| 45      | 14.9 | DMD       | No         | 12.0                      | Nonsense      | 57    | c.8420G>A                   | p.Trp2807*         | reported   | Unknown                  |
| 46      | 7.7  | DMD       | Yes        |                           | Nonsense      | 25    | c.3328G>T                   | p.Glu1110*         | reported   | Yes                      |
| 47      | 6.7  | DMD       | Yes        |                           | Small del     | 23    | c.2962delT                  | p.Ser988Leufs*16   | unreported | Yes                      |
| 48      | 9.7  | DMD       | Yes        |                           | Nonsense      | 66    | c.9568C>T                   | p.Arg3190*         | reported   | Yes                      |
| 49      | 9.5  | DMD       | Yes        |                           | Small del     | 16    | c.1872delA                  | p.Lys624Asnfs*8    | unreported | Unknown                  |
| 50      | 9.4  | DMD       | Yes        |                           | Small del     | 13    | c.1533-1536del              | p.His512Trpfs*4    | reported   | Unknown                  |
| 51      | 8.6  | DMD       | No         | 8.0                       | Nonsense      | 35    | c.4870C>T                   | p.Gln1624*         | reported   | No                       |
| 52      | 12.6 | IMD       | Yes        |                           | Nonsense      | 30    | c.4142T>G                   | p.Leu1381*         | unreported | No                       |
| 53      | 9.8  | DMD       | Yes        |                           | Splicing      | int10 | c.1150-2A>G                 |                    | unreported | Yes                      |
| 54      | 10.5 | DMD       | Yes        |                           | Small ins     | 42    | c.6077-6078insA             | p.Asp2026Glufs*4   | unreported | Unknown                  |
| 55      | 11.1 | DMD       | Yes        |                           | Small ins     | 27    | c.3772dupT                  | p.Cys1258Leufs*1   | unreported | Unknown                  |
| 56      | 6.6  | DMD       | Yes        |                           | Splicing      | int11 | c.1114-2A>T                 |                    | unreported | Unknown                  |
| 57      | 4.8  | DMD       | Yes        |                           | Nonsense      | 23    | c.3151C>T                   | p.Arg1051*         | reported   | Unknown                  |
| 58      | 7.1  | DMD       | Yes        |                           | Small del     | 33    | c.4583delA                  | p.Gln1528Argfs*18  | unreported | Unknown                  |
| 59      | 4.3  | DMD       | Yes        |                           | Small del     | 26    | c.3466-3467del              | p.Val1156Lysfs*7   | unreported | Yes                      |
| 60      | 11.7 | DMD       | Yes        |                           | Small ins     | 33    | c.4561-4562insA             | p.Met1521Asnfs*2   | unreported | Unknown                  |
| 61      | 6.4  | DMD       | Yes        |                           | Nonsense      | 33    | c.4567G>T                   | p.Glu1523*         | unreported | Unknown                  |
| 62      | 15.9 | DMD       | No         | 12.0                      | Nonsense      | 33    | c.4660G>T                   | p.Glu1554*         | unreported | Unknown                  |
| 63      | 20.8 | IMD       | No         | 14.0                      | Nonsense      | 16    | c.1843C>T                   | p.Gln615*          | reported   | Unknown                  |
| 64      | 8.2  | DMD       | Yes        |                           | Small ins     | 3     | c.130dupC                   | p.Leu44Profs*45    | unreported | Unknown                  |
| 65      | 7.3  | DMD       | Yes        |                           | Nonsense      | 32    | c.4483C>T                   | p.Gln1495*         | reported   | Unknown                  |
| 66      | 11.8 | DMD       | No         | 8.0                       | Splicing      | int56 | c.8390+1G>A                 |                    | reported   | Unknown                  |
| 67      | 6.2  | DMD       | Yes        |                           | Nonsense      | 63    | c.9249G>A                   | p.Trp3083*         | unreported | No                       |

|     |      |     |     |      |           |       |                 |                  |            |         |
|-----|------|-----|-----|------|-----------|-------|-----------------|------------------|------------|---------|
| 68  | 10.4 | DMD | Yes |      | Nonsense  | 32    | c.4414C>T       | p.Gln1472*       | reported   | Yes     |
| 69  | 8.9  | DMD | Yes |      | Nonsense  | 26    | c.3580C>T       | p.Gln1194*       | reported   | Unknown |
| 70  | 6.8  | DMD | Yes |      | Nonsense  | 20    | c.2527G>T       | p.Glu843*        | reported   | Unknown |
| 71  | 15.0 | IMD | Yes |      | Nonsense  | 17    | c.2006T>C       | p.Val669*        | unreported | Yes     |
| 72  | 10.8 | DMD | No  | 7.0  | Nonsense  | 41    | c.5899C>T       | p.Arg1967*       | reported   | Yes     |
| 73  | 14.0 | IMD | Yes |      | Nonsense  | 21    | c.2758c>T       | p.Gln920*        | reported   | Unknown |
| 74  | 13.3 | DMD | No  | 9.0  | Nonsense  | 16    | c.1938T>A       | P.Cys646*        | unreported | Yes     |
| 75  | 8.5  | DMD | Yes |      | Nonsense  | 12    | c.1339C>T       | p.Gly447*        | unreported | Yes     |
| 76  | 9.6  | DMD | Yes |      | Small del | 17    | c.2034delG      | p.Thr679Glnfs*3  | unreported | Yes     |
| 77  | 5.5  | DMD | Yes |      | Nonsense  | 33    | c.4618G>T       | p.Glu1540*       | reported   | Unknown |
| 78  | 9.9  | DMD | Yes |      | Splicing  | int46 | c.6762+2T>A     |                  | unreported | Yes     |
| 79  | 9.1  | DMD | Yes |      | Nonsense  | 7     | c.583C>T        | p.Arg195*        | reported   | No      |
| 80  | 8.5  | DMD | Yes |      | Small del | 24    | c.3205delG      | p.Val1069Phefs*3 | unreported | Yes     |
| 81  | 9.9  | DMD | Yes |      | Splicing  | int27 | c.3417+1G>T     |                  | unreported | Yes     |
| 82  | 4.3  | DMD | Yes |      | Nonsense  | 7     | c.583C>T        | p.Arg195*        | reported   | Unknown |
| 83  | 6.3  | DMD | Yes |      | Nonsense  | 19    | c.2302C>T       | p.Arg768*        | reported   | Unknown |
| 84  | 5.2  | DMD | Yes |      | Nonsense  | 22    | c.2869C>T       | p.Gln957*        | reported   | No      |
| 85  | 3.0  | DMD | Yes |      | Small ins | 12    | c1427-1428insGA | p.Glu476Lysfs*11 | unreported | Unknown |
| 86  | 5.7  | DMD | Yes |      | Nonsense  | 11    | c.1255C>T       | p.Gln419*        | reported   | Yes     |
| 87  | 4.9  | DMD | Yes |      | Nonsense  | 6     | c.433C>T        | p.Arg145*        | reported   | Unknown |
| 88  | 4.3  | DMD | Yes |      | Nonsense  | 50    | c.7288G>T       | p.Gly2430*       | unreported | Yes     |
| 89  | 3.3  | DMD | Yes |      | Nonsense  | 3     | c.119A>T        | p.Lys1707*       | unreported | Yes     |
| 90  | 4.1  | DMD | Yes |      | Missense  | 55    | c.7828C>A       | p.Pro2610Thr     | unreported | Yes     |
| 91  | 12.1 | DMD | No  | 10.0 | Small del | 16    | c.1979delA      | p.Lys660Argfs*17 | unreported | No      |
| 92  | 2.3  | DMD | Yes |      | Nonsense  | 60    | c.9029C>G       | p.Ser3010*       | reported   | Yes     |
| 93  | 5.8  | DMD | Yes |      | Nonsense  | 19    | c.2368C>T       | p.Gln790*        | reported   | Unknown |
| 94  | 7.0  | DMD | Yes |      | Nonsense  | 58    | c.8608c>T       | p.Arg2870*       | reported   | Yes     |
| 95  | 2.7  | DMD | Yes |      | Splicing  | int5  | c.334-1G>A      |                  | unreported | Yes     |
| 96  | 3.2  | DMD | Yes |      | Small del | 42    | c.6006_6007del  | p.Glu2003Asnfs*1 | unreported | Unknown |
| 97  | 1.8  | DMD | Yes |      | Nonsense  | 19    | c.2302C>T       | p.Arg768*        | reported   | Yes     |
| 98  | 9.9  | DMD | Yes |      | Splicing  | int46 | c.6742+3T>A     |                  | unreported | Yes     |
| 99  | 2.3  | DMD | Yes |      | Nonsense  | 24    | c.3259C>T       | p.Gln1087*       | reported   | Yes     |
| 100 | 11.0 | DMD | Yes |      | Nonsense  | 25    | c.3426C>A       | p.Cys1142*       | unreported | Unknown |
| 101 | 5.3  | DMD | Yes |      | Missense  | 6     | c.496G>T        | p.Gly166cys      | unreported | No      |
| 102 | 2.9  | DMD | Yes |      | Splicing  | int52 | c7661-1G>A      |                  | reported   | Yes     |
| 103 | 6.7  | DMD | Yes |      | Nonsense  | 20    | c.2605C>T       | p.Gln869*        | reported   | Yes     |
| 104 | 7.8  | DMD | Yes |      | Nonsense  | 44    | c.6292C>T       | p.Arg2098*       | reported   | Yes     |
| 105 | 9.6  | DMD | Yes |      | Nonsense  | 22    | c.2832T>A       | p.Tyr944*        | unreported | No      |
| 106 | 12.9 | IMD | Yes |      | Nonsense  | 27    | c.3769A>T       | p.Lys1257*       | unreported | Unknown |
| 107 | 8.0  | DMD | Yes |      | Nonsense  | 10    | c.984C>T        | P.Arg1662*       | unreported | Yes     |
| 108 | 3.2  | DMD | Yes |      | Nonsense  | 26    | c.3580C>T       | p.Gln1194*       | reported   | Yes     |
| 109 | 10.1 | DMD | Yes |      | Nonsense  | 18    | c.2260C>T       | p.Arg754*        | unreported | Yes     |
| 110 | 11.7 | DMD | Yes |      | Nonsense  | 10    | c.1062G>A       | p.Trp354*        | reported   | Unknown |
| 111 | 6.9  | DMD | Yes |      | Nonsense  | 30    | c.4108C>T       | p.Gln1370*       | reported   | Unknown |
| 112 | 10.6 | DMD | Yes |      | Nonsense  | 9     | c.853G>T        | p.Gly285*        | reported   | Unknown |
| 113 | 10.0 | DMD | No  | 9.0  | Nonsense  | 43    | c.6256G>T       | p.Glu2086*       | unreported | Yes     |
| 114 | 5.3  | DMD | Yes |      | Nonsense  | 57    | c.8443C>T       | p.Gln2815*       | reported   | No      |
| 115 | 6.8  | DMD | Yes |      | Nonsense  | 55    | c.8194A>T       | p.Lys2732*       | reported   | No      |
| 116 | 9.7  | DMD | Yes |      | Splicing  | int5  | c.358-2A>G      |                  | reported   | Yes     |
| 117 | 17.1 | BMD | Yes |      | Nonsense  | 53    | c.7672C>T       | p.Gln2558*       | reported   | No      |
| 118 | 4.8  | DMD | Yes |      | Nonsense  | 7     | c.541C>T        | p.Gln181*        | unreported | No      |
| 119 | 6.9  | DMD | Yes |      | Nonsense  | 17    | c.1997C>A       | p.ser666*        | unreported | Unknown |
| 120 | 3.2  | DMD | Yes |      | Nonsense  | 25    | c.3061C>T       | p.Gln1021*       | unreported | Yes     |
| 121 | 12.5 | IMD | Yes |      | Nonsense  | 5     | c.336G>A        | p.Trp112*        | reported   | Yes     |
| 122 | 11.0 | DMD | Yes |      | Nonsense  | 7     | c.583C>T        | p.Arg195*        | reported   | Unknown |
| 123 | 13.9 | DMD | No  | 12.0 | Nonsense  | 2     | c.77A>G         | p.Asn26*         | reported   | Yes     |
| 124 | 13.5 | IMD | Yes |      | Nonsense  | 25    | c.3028G>T       | p.Glu1010*       | unreported | Yes     |
| 125 | 5.6  | DMD | Yes |      | Nonsense  | 32    | c.4405C>T       | p.Gln1469*       | reported   | Yes     |
| 126 | 1.8  | DMD | Yes |      | Small del | 42    | c.5996_5999del  | p.Thr1999Ilefs*2 | unreported | Yes     |
| 127 | 11.2 | DMD | Yes |      | Nonsense  | 39    | c.5530C>T       | p.Arg1844*       | reported   | Yes     |
| 128 | 16.3 | IMD | No  | 13.0 | Splicing  | int21 | c.2804-1G>T     |                  | reported   | No      |
| 129 | 7.4  | DMD | Yes |      | Nonsense  | 6     | c.433C>T        | p.Arg145*        | reported   | Yes     |
| 130 | 7.0  | DMD | Yes |      | Nonsense  | 11    | c.1305G>A       | p.Ser443*        | unreported | Unknown |
| 131 | 10.8 | DMD | Yes |      | Small del | 13    | c.1593delA      | p.Glu531Aspfs*52 | unreported | Yes     |
| 132 | 7.7  | DMD | Yes |      | Small ins | 13    | c.1540dupG      | p.val514Glyfs*5  | reported   | Unknown |
| 133 | 7.1  | DMD | Yes |      | Nonsense  | 44    | c.6310G>T       | p.Glu2104*       | reported   | Unknown |
| 134 | 5.5  | DMD | Yes |      | Nonsense  | 59    | c.8713C>T       | p.Arg2905*       | reported   | Unknown |
| 135 | 4.7  | DMD | Yes |      | Small del | 16    | c.1978_1979del  | p.Lys660Glufs*59 | reported   | Unknown |
| 136 | 9.6  | DMD | Yes |      | Nonsense  | 18    | c.2213C>G       | p.Ser738*        | unreported | Unknown |
| 137 | 7.4  | DMD | Yes |      | Nonsense  | 44    | c.6436A>T       | p.Lys2146*       | unreported | Yes     |
| 138 | 7.8  | DMD | Yes |      | Small del | 40    | c.5697del       | Lys1899Asnfs*2   | reported   | Yes     |

|      |      |     |     |     |           |       |                    |                   |            |         |
|------|------|-----|-----|-----|-----------|-------|--------------------|-------------------|------------|---------|
| 139  | 2.7  | DMD | Yes |     | Missense  | 27    | c.3774C>G          | p.Cys1258Trp      | unreported | Yes     |
| 140  | 5.2  | DMD | Yes |     | Nonsense  | 14    | c.1702C>T          | p.Gln568*         | reported   | Yes     |
| 141  | 5.5  | DMD | Yes |     | Nonsense  | 44    | c.6292C>T          | p.Arg2093*        | unreported | Yes     |
| 142  | 2.6  | DMD | Yes |     | Nonsense  | 66    | c.9568C>T          | p.Arg3190*        | reported   | Yes     |
| 143  | 2.8  | DMD | Yes |     | Nonsense  | 7     | c.559C>T           | p.Gln187*         | unreported | Yes     |
| 144  | 8.1  | DMD | Yes |     | Splicing  | int56 | c.8300-IG>C        |                   | unreported | No      |
| 145  | 9.7  | DMD | Yes |     | Nonsense  | 15    | c.1777C>T          | p.Gln593*         | reported   | No      |
| 146  | 9.1  | DMD | Yes |     | Small del | 8     | c.676-678delAAG    | p.Lys226del       | reported   | No      |
| 147  | 12.2 | IMD | Yes |     | Small ins | 3     | c.115-117 insA     | p.Asn39Lysfs *5   | unreported | Unknown |
| 148  | 9.3  | DMD | Yes |     | Nonsense  | 44    | c.6373c>T          | p.Gln2125*        | reported   | Yes     |
| 149  | 14.8 | DMD | No  | 8.0 | Small del | 47    | c.6807-6810delACAA | p.Leu2270Metfs*9  | unreported | Unknown |
| 150  | 11.0 | DMD | Yes |     | Nonsense  | 55    | c.8215C>T          | p.Gln2739*        | unreported | Unknown |
| 151  | 9.7  | DMD | Yes |     | Nonsense  | 6     | c.436C>T           | p.Gln146*         | reported   | Yes     |
| 152  | 10.0 | DMD | Yes |     | Small del | 52    | c.7559delT         | p.Leu2520Trpfs*18 | unreported | Yes     |
| 153  | 12.6 | IMD | Yes |     | Small del | 20    | c.2471_2474del     | p.Asn824Serfs*21  | unreported | Yes     |
| 154  | 9.9  | DMD | Yes |     | Nonsense  | 34    | c.4732A>T          | P.Lys1578*        | unreported | Unknown |
| 155  | 11.9 | DMD | No  | 8.0 | Nonsense  | 58    | c.8608C>T          | p.Arg2870*        | reported   | Unknown |
| 156  | 8.9  | DMD | Yes |     | Missense  | 37    | c.5234G>A          | p.Arg1745His      | reported   | Unknown |
| 157  | 8.5  | DMD | Yes |     | Small ins | 16    | c.1898dupA         | Asn633Lysfs*2     | unreported | Yes     |
| 158  | 11.5 | DMD | Yes |     | Small del | 70    | c.10101_10103del   | p.Glu3367del      | reported   | Yes     |
| 159  | 7.3  | DMD | Yes |     | Missense  | 1     | c.1A>T             | p.Met1Leu         | unreported | Unknown |
| 160  | 10.3 | DMD | Yes |     | Small ins | 70    | c.1648dupC         | p.Arg550Profs*17  | unreported | Yes     |
| 161  | 9.4  | DMD | Yes |     | Small del | 13    | c.1533_1536del     | His512Trpfs*4     | reported   | Unknown |
| 162  | 10.2 | DMD | Yes |     | Small ins | 69    | c.10027_10028insT  | p.Ser3343Phefs*9  | unreported | Unknown |
| 163  | 10.7 | DMD | Yes |     | Splicing  | int56 | c.8391-1G>A        |                   | reported   | Yes     |
| 164  | 12.8 | IMD | Yes |     | Missense  | 22    | c.2949G>T          | p.Gln983His       | reported   | Unknown |
| 165  | 6.2  | DMD | Yes |     | Nonsense  | 41    | c.5851C>T          | p.Gln1951*        | reported   | Unknown |
| 166  | 10.3 | DMD | Yes |     | Small ins | 74    | c.10453-10454insC  | p.Leu3485Profs*6  | unreported | Unknown |
| 167  | 13.1 | IMD | Yes |     | Nonsense  | 14    | c.1702C>T          | p.Gln568*         | reported   | Yes     |
| 168  | 7.1  | DMD | Yes |     | Nonsense  | 10    | c.998C>A           | p.Ser333*         | reported   | Yes     |
| 169  | 10.6 | DMD | Yes |     | Nonsense  | 14    | c.1638G>A          | p.Trp546*         | reported   | Yes     |
| 170  | 24.7 | BMD | Yes |     | Splicing  | int18 | c.2254-2A>T        |                   | unreported | Yes     |
| 171  | 6.0  | DMD | Yes |     | Small del | 8     | c.676-678delAAG    | p.Lys226del       | reported   | Unknown |
| 172  | 12.9 | IMD | Yes |     | Splicing  | int20 | c.2435-2A>T        |                   | unreported | Unknown |
| 173  | 11.0 | DMD | Yes |     | Small ins | 20    | c.2462-2463insA    | p.Glu821Glufs*4   | unreported | Unknown |
| 174  | 10.9 | DMD | Yes |     | Nonsense  | 23    | c.3034delC         | p.Leu1012*        | unreported | Unknown |
| 175  | 7    | DMD | Yes |     | Nonsense  | 11    | c.1305G>A          | p.Ser443*         | unreported | No      |
| 176  | 12.0 | IMD | Yes |     | Nonsense  | 43    | c.6223C>T          | p.Gln2075*        | reported   | No      |
| 177# | 6.6  | DMD | Yes |     | Splicing  | int13 | c.1114-1 G>A*      |                   | unreported | Yes     |
| 178# | 6.6  | DMD | Yes |     | Splicing  | int13 | c.1114-1 G>A*      |                   | unreported | Yes     |
| 179  | 10.9 | DMD | Yes |     | Small ins | 22    | c.2864dupT         | Gln956Profs*13    | unreported | Yes     |
| 180  | 13.9 | IMD | Yes |     | Nonsense  | 20    | c.2518G>T          | p.Gln840*         | reported   | Unknown |
| 181  | 8.3  | DMD | Yes |     | Splicing  | int6  | c.531-2A>G         |                   | unreported | Unknown |
| 182  | 37.5 | BMD | Yes |     | Nonsense  | 1     | c.11G>A            | p.Trp4*           | reported   | Unknown |
| 183  | 4.6  | DMD | Yes |     | Nonsense  | 1     | c.12G>A            | p.Trp4*           | unreported | Yes     |
| 184  | 6.3  | DMD | Yes |     | Nonsense  | 19    | c.2302C>T          | p.Arg768*         | reported   | Yes     |
| 185  | 5.7  | DMD | Yes |     | Nonsense  | 11    | c.1255C>T          | p.Gln419*         | unreported | Yes     |
| 186  | 8.9  | DMD | Yes |     | Nonsense  | 60    | c.8944C>T          | p.Arg2982*        | reported   | Yes     |
| 187  | 4.9  | DMD | Yes |     | Nonsense  | 6     | c.433C>T           | p.Arg145*         | reported   | Yes     |
| 188  | 6.0  | DMD | Yes |     | Nonsense  | 58    | c.8608C>T          | p.Arg2870*        | reported   | Yes     |
| 189  | 11.2 | DMD | Yes |     | Nonsense  | 39    | c.5530C>T          | p.Arg1844*        | reported   | Unknown |
| 190  | 7.3  | DMD | Yes |     | Nonsense  | 35    | c.4996C>T          | p.Arg1666*        | reported   | Unknown |
| 191  | 6.4  | DMD | Yes |     | Nonsense  | 35    | c.4561G>T          | p.Glu1523*        | unreported | Yes     |
| 192  | 5.5  | DMD | Yes |     | Nonsense  | 33    | c.4618G>T          | p.Glu1540*        | reported   | Yes     |
| 193  | 10.1 | DMD | Yes |     | Nonsense  | 18    | c.2260C>T          | p.Arg754*         | unreported | Yes     |
| 194  | 11.0 | DMD | Yes |     | Nonsense  | 32    | c.4375C>T          | p.Arg1459*        | reported   | Unknown |
| 195  | 8.0  | DMD | Yes |     | Nonsense  | 10    | c.984C>T           | p.Arg1662*        | unreported | Yes     |
| 196  | 4.3  | DMD | Yes |     | Nonsense  | 7     | c.583C>T           | p.Arg195*         | reported   | Yes     |
| 197  | 9.2  | DMD | No  | 9.0 | Small del | 33    | c.4587delG         | p.Lys1529Asnfs*13 | reported   | Yes     |

The patients with # are brothers.
